# Supplementary material for: Theoretical and experimental investigations on the photoconductivity and nonlinear optical properties of donor–acceptor π conjugated copolymer, poly(2,5-(3,4-ethylenedioxythiophene)-alt-2,7-(9,9-dioctylfluorene))
Source: Royal Society of Chemistry journal article supplement (doi:10.1039/c4ra13024c), 2014-12-23
Supplement: c4ra13024c1.pdf [file c4ra13024c1.pdf]

## Theoretical and Experimental Investigations on the Photoconductivity and Nonlinear Optical properties of Donor-Acceptor $\pi$ Conjugated Copolymer, Poly(2,5-(3,4-ethylenedioxythiophene)-alt-2,7-(9,9-dioctylfluorene))

Sona Narayanan<sup>1</sup>, Anshad Abbas<sup>2</sup>, Sreejesh Poikavila Raghunathan<sup>1</sup>, Krishnapillai Sreekumar<sup>3</sup>, Cheranellore Sudha Kartha<sup>2</sup>, Rani Joseph<sup>1\*</sup>

<sup>1</sup>Department of Polymer Science and Rubber Technology, Cochin University of Science and Technology, Cochin-682022, Kerala, India

<sup>2</sup>Department of Physics, Cochin University of Science and Technology, Cochin-682022, Kerala, India

<sup>3</sup>Department of Chemistry, Cochin University of Science and Technology, Cochin-682022, Kerala, India

Correspondance to: Rani Joseph (E-mail:ranigeorge2011@gmail.com, sonachalil@gmail.com)

### SUPPORTING INFORMATION

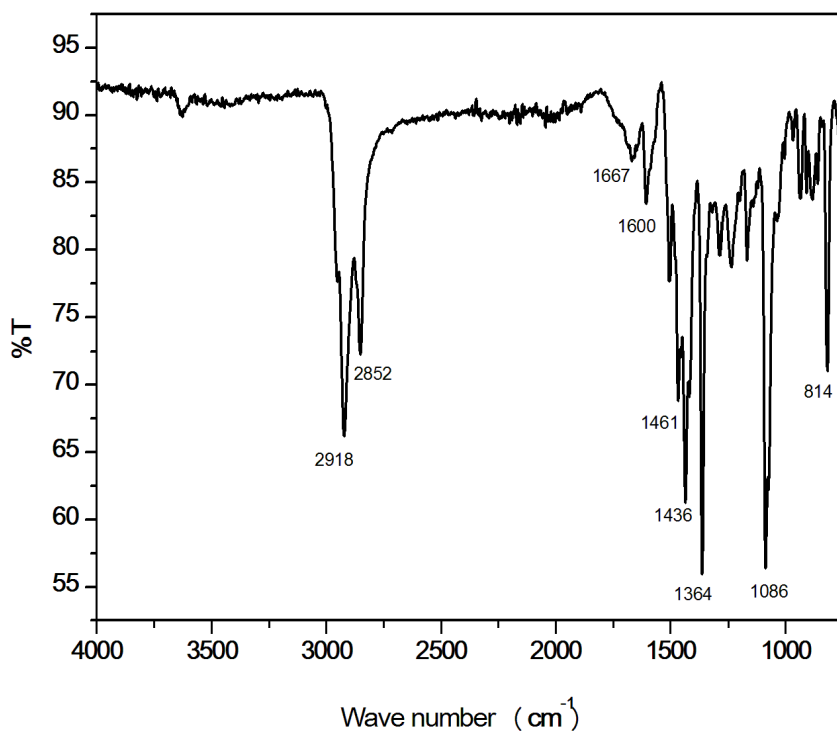

Fig. S1 FT-IR spectra of P(EDOT-FL)

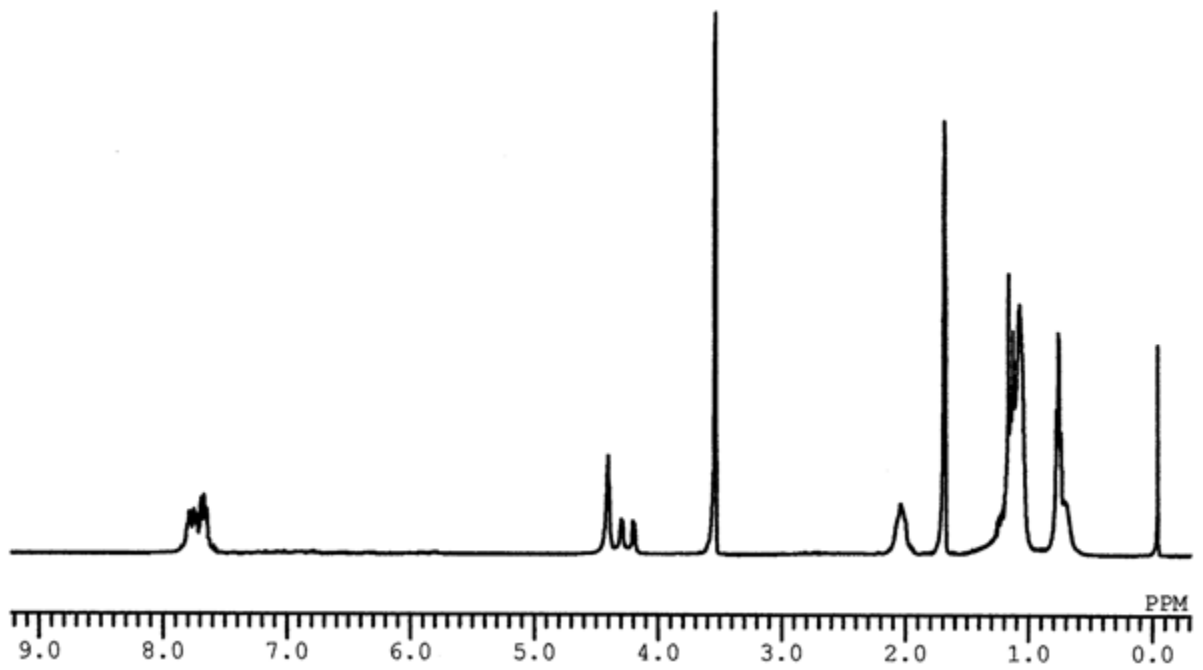

Fig. S2  $^1\text{H}$  NMR spectra of P(EDOT-FL)
